# Supplementary material for: Application of Process Mapping to catalyze integration of HIV services in cancer care
Source: Research Square preprint supplement (doi:10.21203/rs.3.rs-9248594/v1), 2026-04-03
Supplement: Supplementary file 2 [file 41a7d37b9ca1f3e4c9d4ccc5.docx]

| **Table 1: Services and activities for cancer care delivery** | | | | | | |
| --- | --- | --- | --- | --- | --- | --- |
| **Step 1** | | | | **Step 2** | | |
| **A** | **B** | **C** | **D** | **E** | **F** | **G** |
| **Service or activity** | **Location of service or activity** | **Staff involved** | **Key supplies/ resources required** | **What happens before this activity?** | **What happens after this activity?** | **Is this a key decision point?**  ***Please explain*** |
| Registration/booking of new cancer patients | Cancer Center Reception | Data Clerks | Human Resource, Health Passports, Referral Letter | Health talks | Consultation | No |
| Assessment of patients, and consultation | Consultation Rooms | Doctors and Clinicians | Human Resource, Health Passports, Lab Supplies, Gloves | Registration and Booking in | Investigations | Yes, Doctors and Clinicians make a treatment plan for the patient |
| Investigations | Cancer Centre Chemo Suite KCH Laboratory, Radiology | Clinicians, Nurses, Lab Techs, Clerks | Stationary Chairs Medication Chemo supplies and monitoring devices Lab bottles for samples collections Medical supplies, documentation | Consultations | Palliative care | Yes, Doctors and Clinicians make a treatment plan for the patient |
| Palliative care Review of patients Prescription of chemotherapy | NCC-OPD Clinic Cancer Centre Consultation Rooms | Clerks Nurses Clinicians/Doctors Dieticians | Medication  Stationary  Reagents and machines  Nutrition supplements | Investigations | Chemotherapy/  treatment | Yes, Nurses make sure the treatment plan is followed |
| Chemotherapy administration | Chemotherapy suite | Nurses | Medical supplies | Palliative care | Discharge/Follow up of patients | Yes, Nurses make sure chemical compounding is done right |
