# Supplementary material for: Application of Process Mapping to catalyze integration of HIV services in cancer care
Source: Research Square preprint supplement (doi:10.21203/rs.3.rs-9248594/v1), 2026-04-03
Supplement: Supplementary file 3 [file 926fccd32e82b004be4f4723.docx]

| **Table 1: Cancer care services and activities showing key decision points for HIV services at Uganda Cancer Institute, Uganda** | | | | | | |
| --- | --- | --- | --- | --- | --- | --- |
| **Step 1** | | | | **Step 2** | | |
| A | B | C | D | E | F | G |
| **Service or activity** | **Location** | **Staff involved** | **Key supplies** | **What happens before** | **What happens after** | **Is this a key decision point for HIV services? Please explain** |
| Security / safety check   - Inquiry/giving directions | Entrance | -Security personnel | -Shelter  -Gun  -Table  -Chair  -Registration book  -Pen | Patients come from their homes or where they are referred from | Triage and file opening | No |
| Triage   - Registration - File opening - Assessment of vitals - Nurse navigation - Triage - Physical navigation | Navigation unit | -Patient navigators  -Nurses  -Medical Records Clerks | -Registrations book  -Pens  -Blood pressure machine  -Thermometer  -Paper file folders  -Computers | Security checking and direction giving | Doctor’s initial review (Physical exam etc.) | No |
| Consultation   - Physical examination - Counseling regarding the diagnosis / information - Request for staging | Doctor’s consultation room | -Medical officers | -Medical forms  -Clinical assessment devices (stethoscope) | Doctor’s initial review (Physical exam, requesting for investigations – blood tests, imaging) | Performing investigation tests (in the laboratory, imaging units etc.) | YES -  Blood test requests include HIV test) |
| Diagnostics   - Laboratory - Imaging - Refining the diagnosis/ additional pathology test | Clinical laboratory or pathology lab or imaging | -Lab technicians / technologists  -Radiographers/Radiologists  -Pathologists | -Lab equipment  -Imaging equipment  -Pathology equipment | -Lab result reports  -Imaging result report  -Pathology result reports | Oncologist’s review of the patient | YES – HIV test is done in the clinical laboratory |
| Oncologist’s consultation   - Patient information - Treatment discussion - Additional Investigations (Lab and Imaging) requests | Oncologist’s consultation room | -Oncologists  - Nurses | -Medical forms  -Clinical assessment devices (stethoscope | -Clinical assessment (Physical exam, review of investigation results), -Treatment planning  -Prescription | -Treatment administration or multidisciplinary tumor board discussion | Yes – referral for HIV care is discussed with the patient. |
| Multidisciplinary treatment planning   - Additional investigations (lab and imaging) | Tumour board meeting room | -Multidisciplinary team (oncologists, nurses, social workers, pharmacies and other specialist | - Medical forms  -Clinical assessment devices (stethoscope | Oncologist’s review and clinical assessment | Treatment administration | No – HIV care is given in HIV clinics which are separate from the cancer center |
| Treatment   - Chemotherapy - Surgery - Palliative Care - Radiotherapy - Immunotherapy - Hormonotherapy - Nursing care - Counselling - Physiotherapy - Scheduling of follow up visits | Chemotherapy room, Operating theatre, Pharmacy, Counselling room OR Physiotherapy room | -Surgeons  -Oncologists  -Palliative care specialist  -Radiation oncologist, radiotherpists, medical physicists  -Nurses  -Counsellors  -Physiotherapists  -Nutritionist | -Weighing scale  -BSA Chart  -Theatre  -Chemo infusion pumps  -Chemo mixing chamber  -Medicines  -Sandries etc.. | Multidisciplinary Tumor board discussion and treatment planning | Support services if required and booking for next treatment date. | Yes – Patient may be referred to visit HIV clinic for care during cancer treatment. |
| Follow up   - Treatment /patient monitoring | Chemotherapy room, Operating theatre, Pharmacy, Counselling room OR Physiotherapy room | -Medical officers  -Lab and imaging staff  -Nurses | -Medical forms  -Clinical assessment devices (stethoscope, etc) | Monitoring laboratory blood tests (routinely CBS only for most patients but may be tumor markers etc.) | Support services if required and booking for next treatment date. | Yes – patient may need to be reminded of their HIV care while on cancer treatment |
