# Supplementary material for: Application of Process Mapping to catalyze integration of HIV services in cancer care
Source: Research Square preprint supplement (doi:10.21203/rs.3.rs-9248594/v1), 2026-04-03
Supplement: Supplementary file 5 [file ba5e197eeb3bacb8040582c0.docx]

| **Table 1: Services and activities for cancer care delivery at Parirenyatwa Radiotherapy Centre, Zimbabwe** | | | | | | |
| --- | --- | --- | --- | --- | --- | --- |
| **Step 1** | | | | **Step 2** | | |
| **A** | **B** | **C** | **D** | **E** | **F** | **G** |
| **Service or activity** | **Location of service or activity** | **Staff involved** | **Key supplies/ resources required** | **What happens before this activity?** | **What happens after this activity?** | **Is this a key decision point for HIV services?**  ***Please explain*** |
| Registration & data capture, booking of patients 1st visit | Reception | Health information officer, Records supervisor | Registration books, file folders, staplers, pens (stationery) | Referral note confirmation | Patient sees nurse for results confirmation & vital signs observations | No |
| *Diagnosis results/**treatment plan confirmation & vital signs observations | Nurses’ station | Nurse | Gloves, BP machine, scales, pens | Registration | *Clerking, history taking  **Preparation for chemotherapy session | No |
| *Clerking, history taking | Consultation rooms | Doctor/Nurse | Stationery | Diagnosis/results confirmation & vital signs observations | *Doctor  **Oncology Nurse for chemotherapy (if treatment plan is already in place) | Yes - pt referred to HIV clinic if indicated |
| *Clinical consultation/initial assessment & treatment plan | Consultation rooms | Doctor/Medical officer/Oncologist | Stationery, linen, PPE, syringes, cannulas, needles, strapping, chemotherapy medicines, lab request forms, hospice referral forms | Vital observations taken | Nurses station for appropriate next step service -Bloods draws, treatment, counselling | Yes – pt referred to HIV clinic if indicated |
| ****Chemotherapy treatment** | Treatment Rooms | Oncology nurses, Doctors | Chemotherapy drugs, PPE, surgical sundries, stationery | Observations/vital signs, blood draws | Monitoring | No |
| ***Results/therapy confirmation** | Nurses’ station | Nurses | Stationery Stationery, linen, PPE, syringes, cannulas, needles, strapping, review registers | Patient is seen by the doctor | Patients is refereed to appropriate referral service for that day eg laboratory, chemotherapy, booking date for review | Yes - Review HIV result, treatment plan |
| Booking of next visit | Reception | Health information officer, Records supervisor | Registration books, patient record | Treatment or clinical assessment | Exit session | No |

**initial visit*

***returning patient*
