# Supplementary material for: Application of Process Mapping to catalyze integration of HIV services in cancer care
Source: Research Square preprint supplement (doi:10.21203/rs.3.rs-9248594/v1), 2026-04-03
Supplement: Supplementary file 6 [file ea3c183f9f48ac8119f0381f.docx]

| **Table 1: Services and activities for cancer care delivery, South Africa** | | | | | | |
| --- | --- | --- | --- | --- | --- | --- |
| **Step 1** | | | | **Step 2** | | |
| **A** | **B** | **C** | **D** | **E** | **F** | **G** |
| **Service or activity** | **Location of service or activity** | **Staff involved** | **Key supplies/ resources required** | **What happens before this activity?** | **What happens after this activity?** | **Is this a key decision point for HIV services?**  ***Please explain*** |
| Triage of patients – sick or ambulant; booked or not | At the door | Nursing sister, Clerk | Register | Patients are presented to the weekly MDT meeting and booked | Registration formal and checking of the blood forms | No |
| Registration of patient and checking of blood form | Front desk | Clerk | Hospital system  Open a new file | Triage | Drawing of blood for laboratory workup | Yes - The blood request form includes an HIV test |
| ******Drawing of blood | Phlebotomist room | Phlebotomist | Phlebotomy kit | Registration  Laboratory request | Vital signs measures | Yes - HIV test is conducted |
| ******Vitals including height and weight | Vitals station | Nurse | BP machine  Height and weight machines | Laboratory workup | Doctor’s visit | No |
| Consultation – the patient is seen by the doctor/oncologist for an initial assessment and treatment plan. | Consultation room | Doctor/Oncologist | - | Vitals | Treatment | Yes - Review HIV result, treatment plan for HIV and counselling |
| Treatment  NB - *if not for chemotherapy, then the patient is sent to outpatient pharmacy* | Chemotherapy room or  Pharmacy | Pharmacist/  Pharmacy Assistant | Medication | Treatment plan | Supportive services | Yes - Also get HIV medication |
| ******Additional services/consultation-supportive services | Palliative/social worker room  NHLS lab for regular blood assessments | Palliative nurse and/or social worker  Chemo nurses | - |  | Bloods assessed by doctor prior to decision making for next chemo cycles | Yes |

*****After registration and checking of the blood form, patients might start with any of these services/activities depending on the queue/patient volume***
