# Supplementary figures and images for: Application of Process Mapping to catalyze integration of HIV services in cancer care
Source: Research Square preprint supplement (doi:10.21203/rs.3.rs-9248594/v1), 2026-04-03

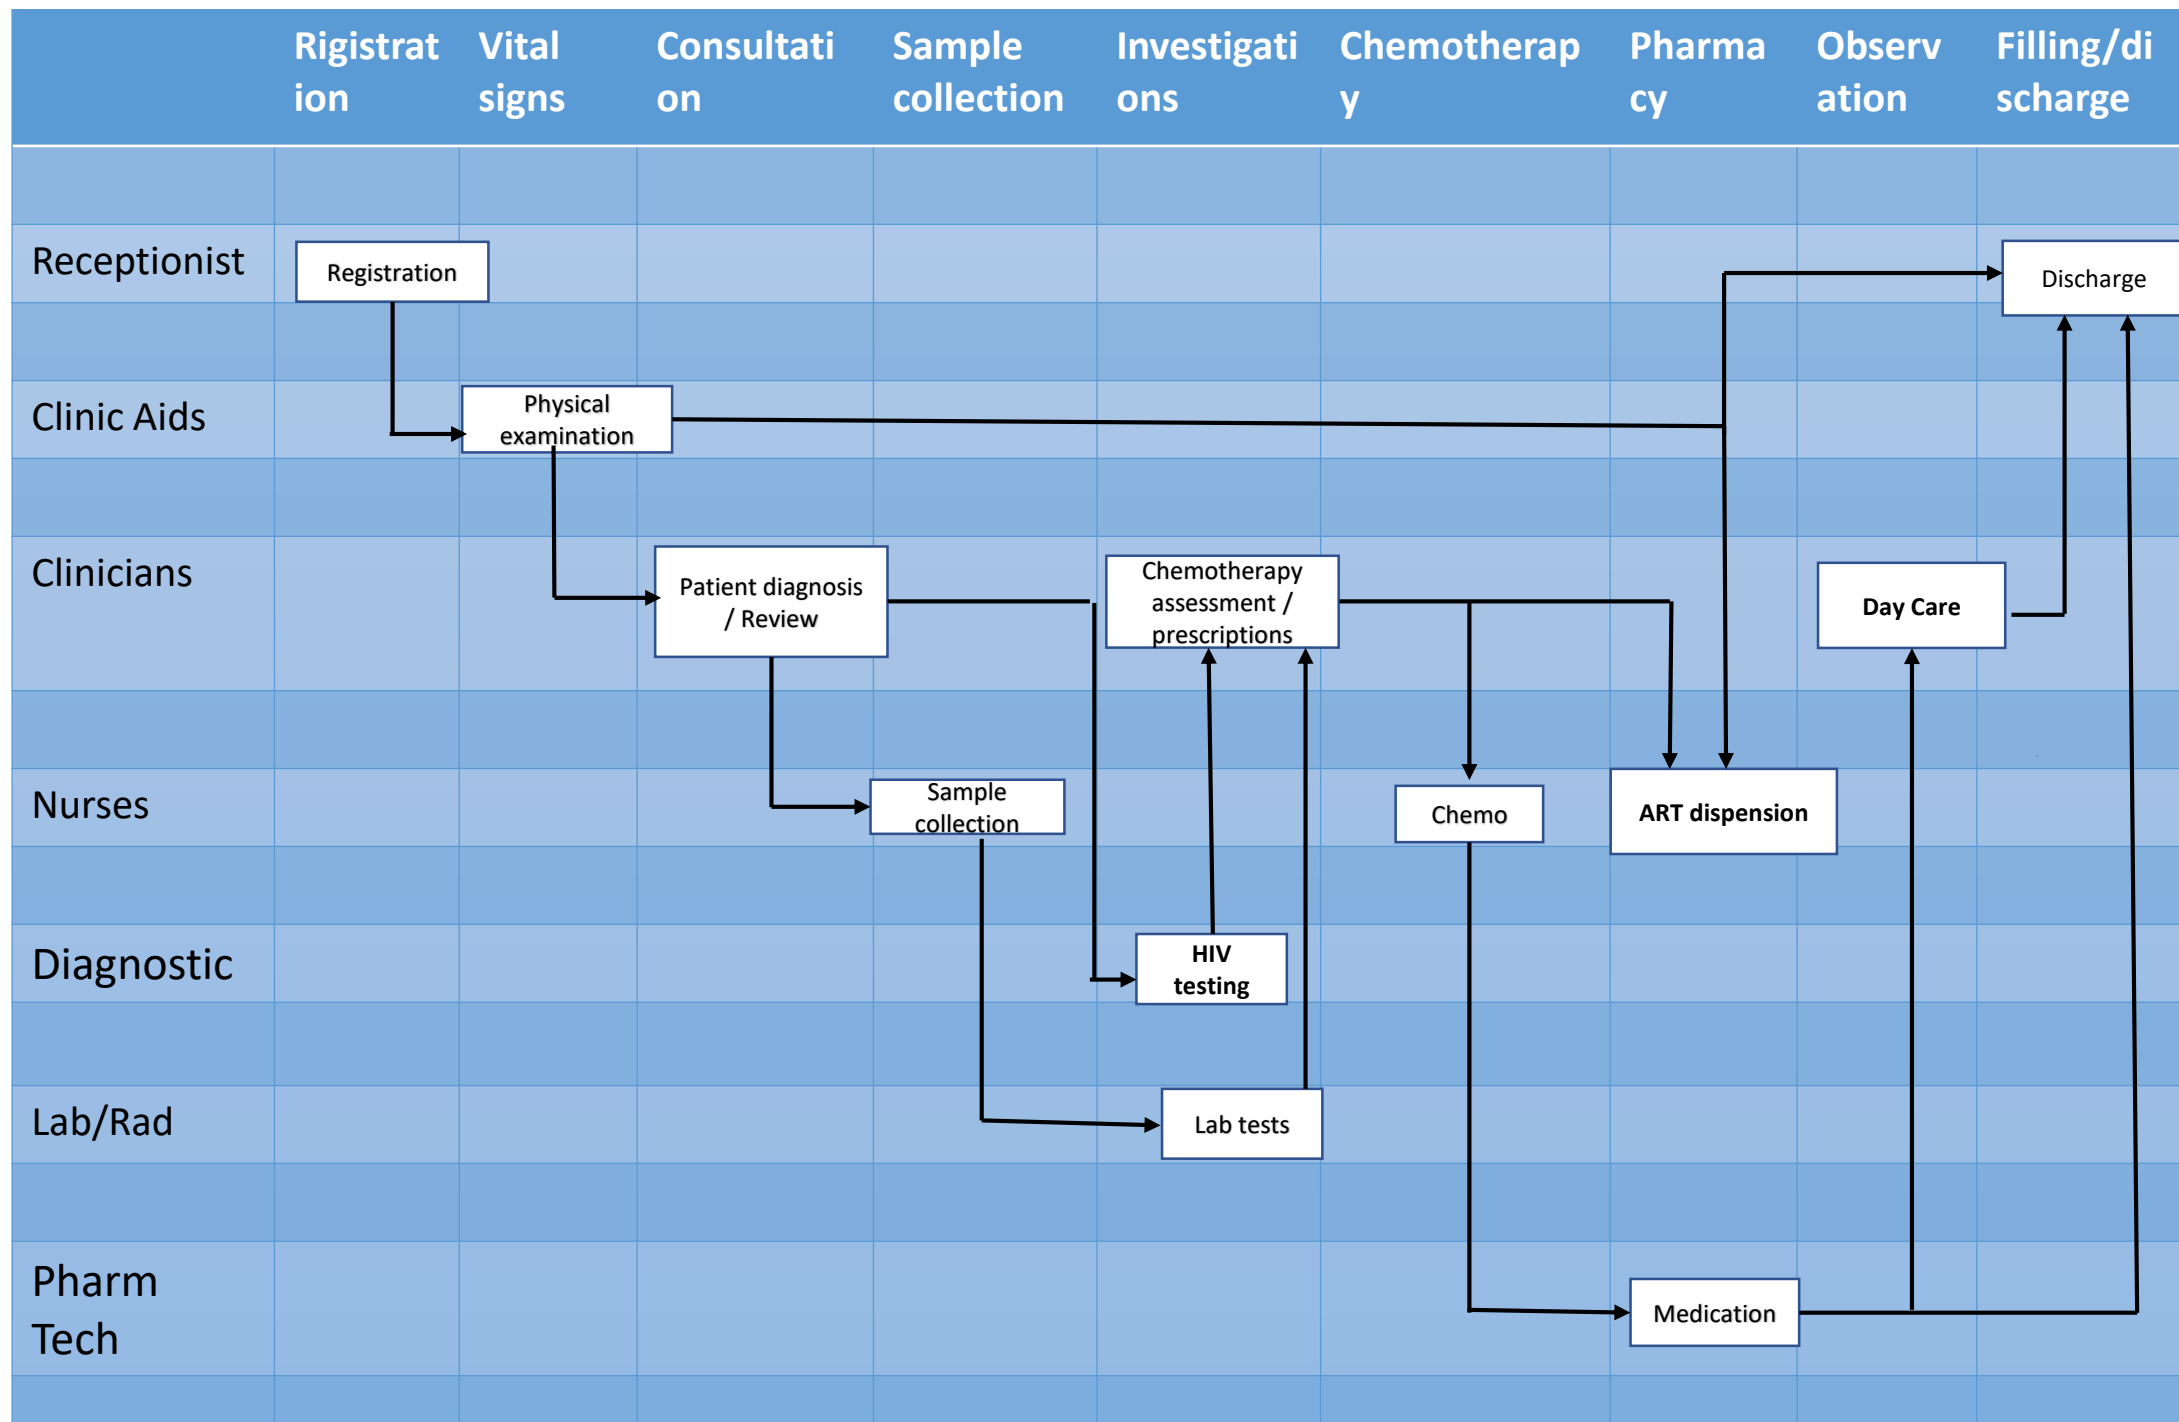

Supplement: Supplementary file 1 [file 35f1f95fe3301f16697dbada.pdf]

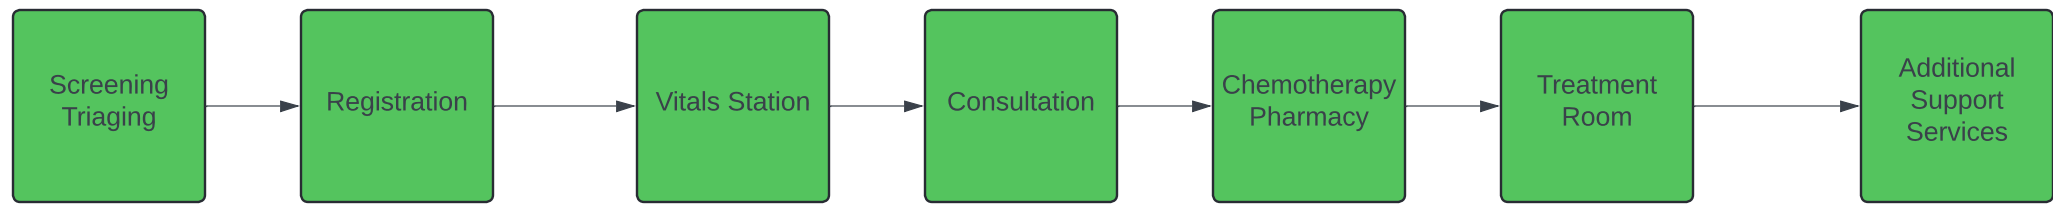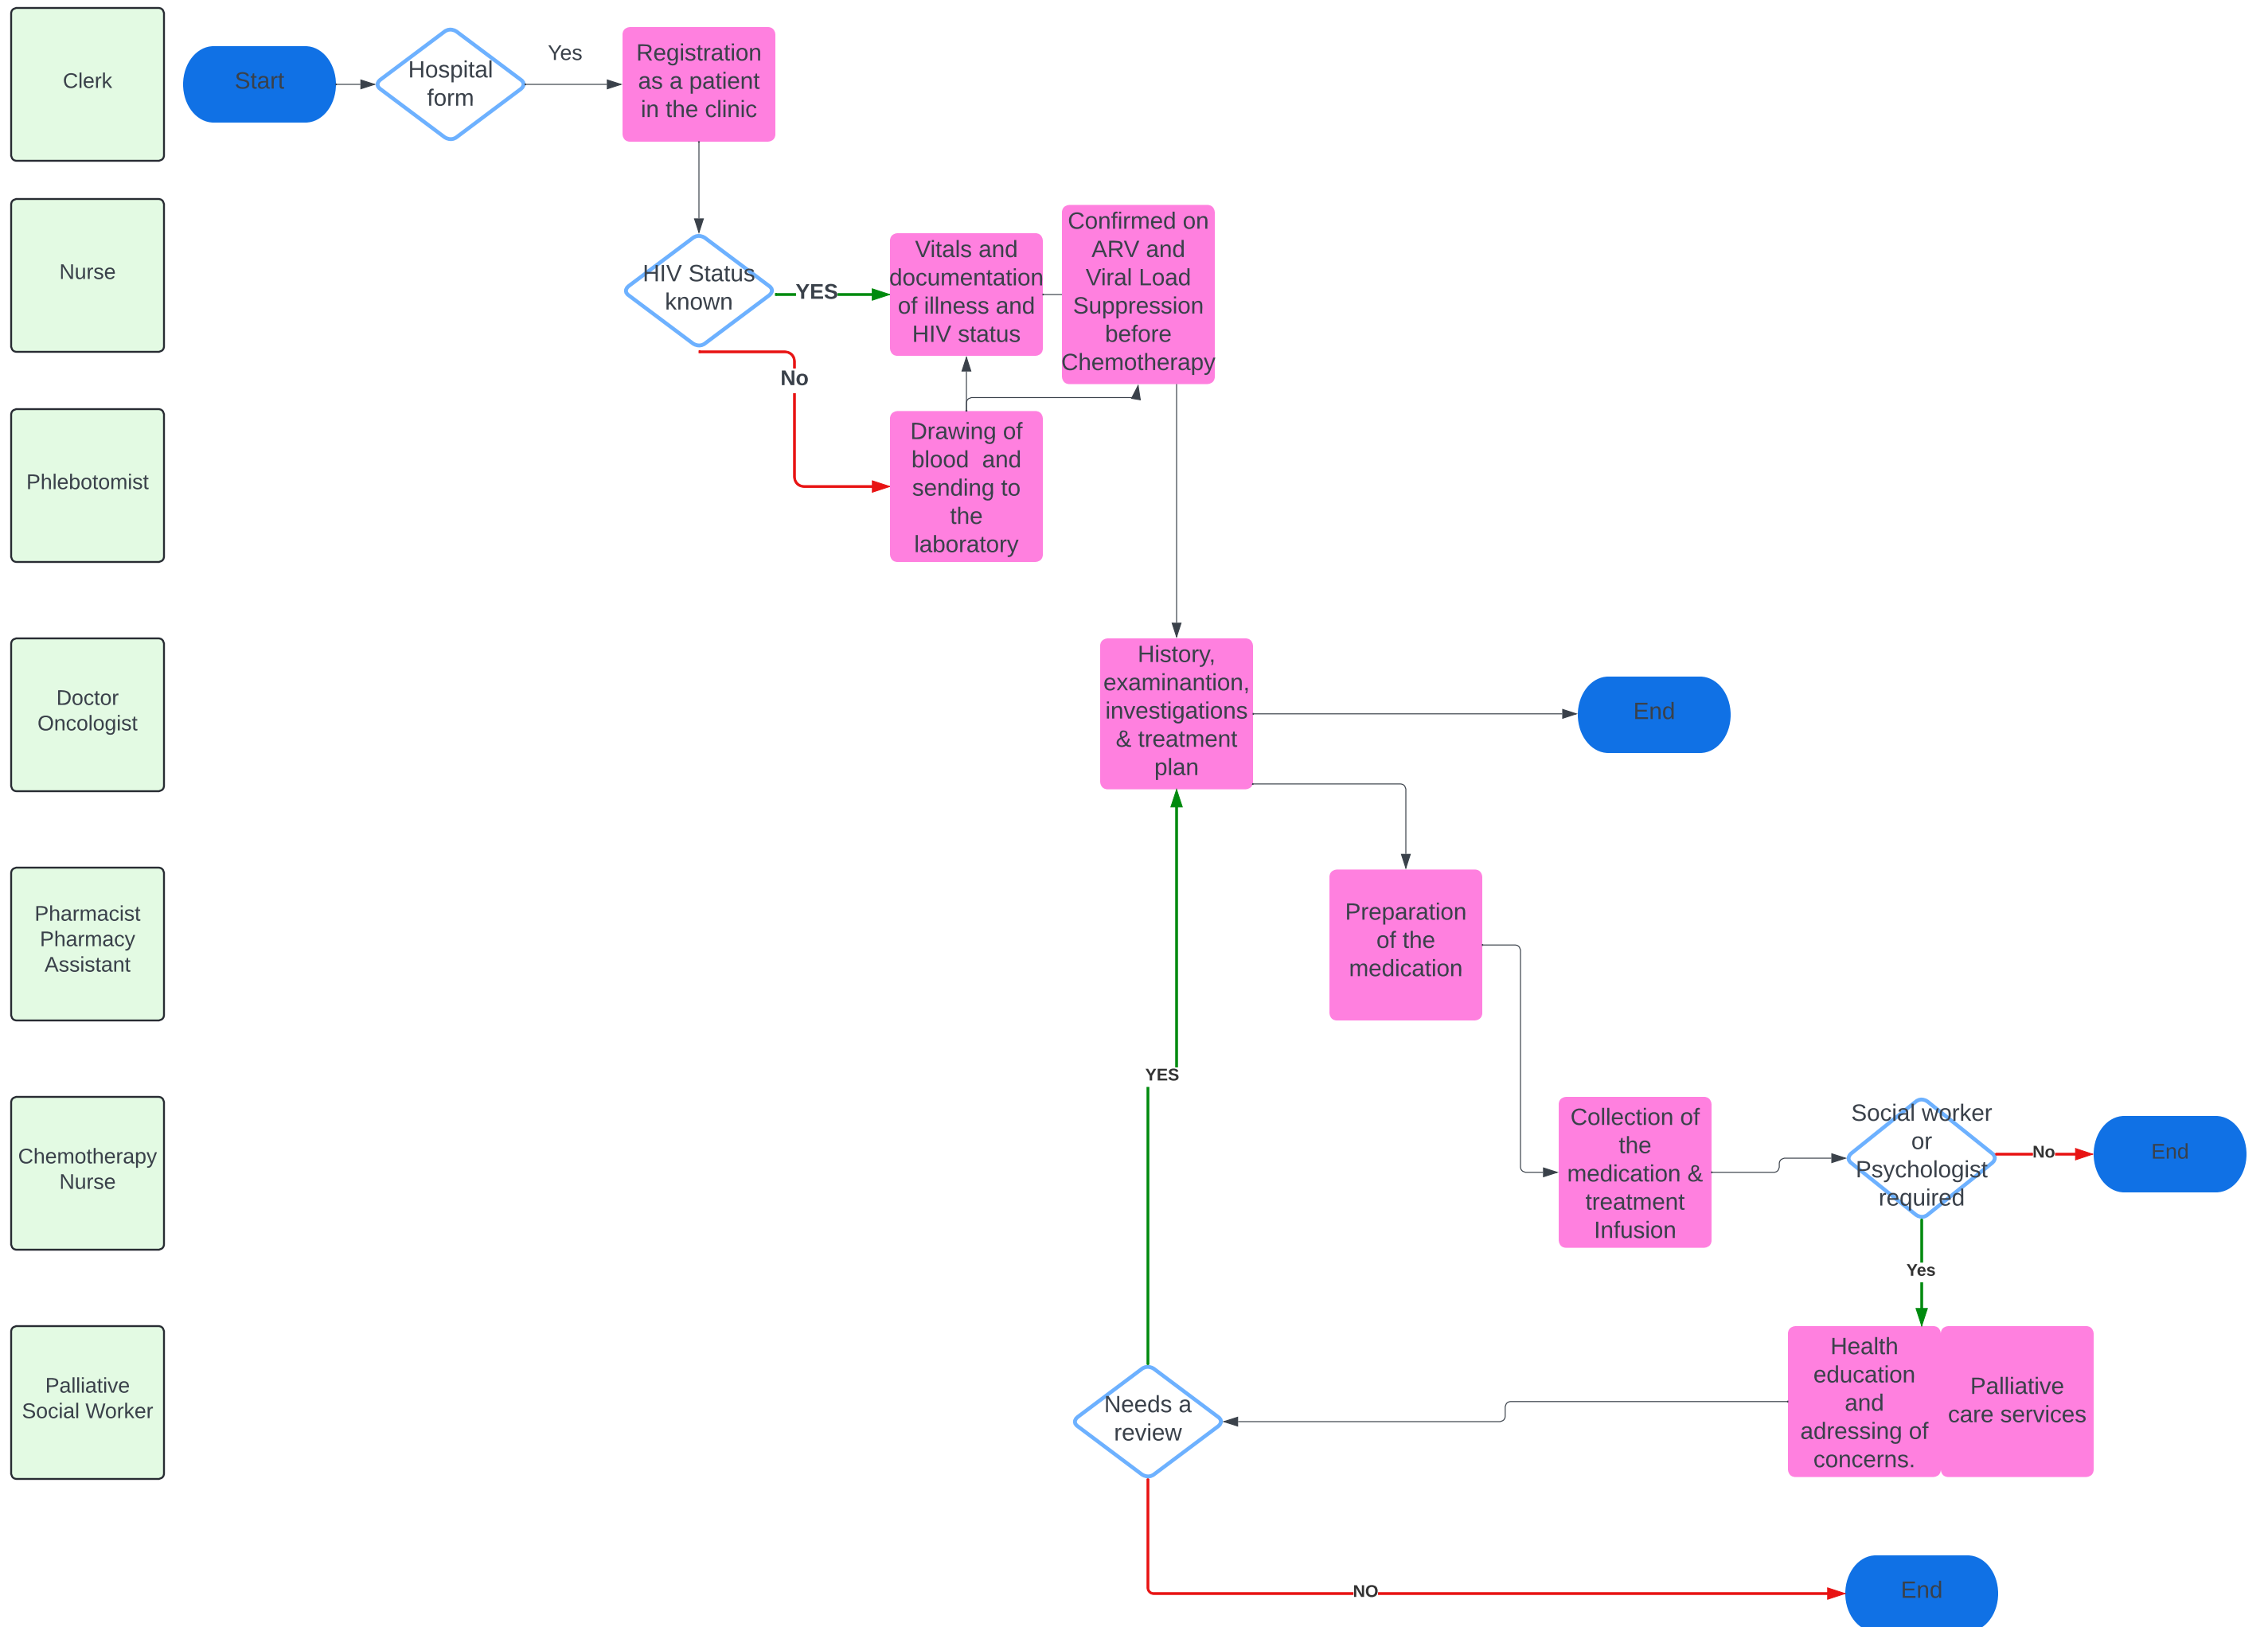

Supplement: Supplementary file 4 [file b8d3e0d2f01dc7af580bc8d6.pdf]

## LEVEL 4 Process Map: Cancer Care pathway (Uganda Cancer Institute) – DIAGRAMATIC

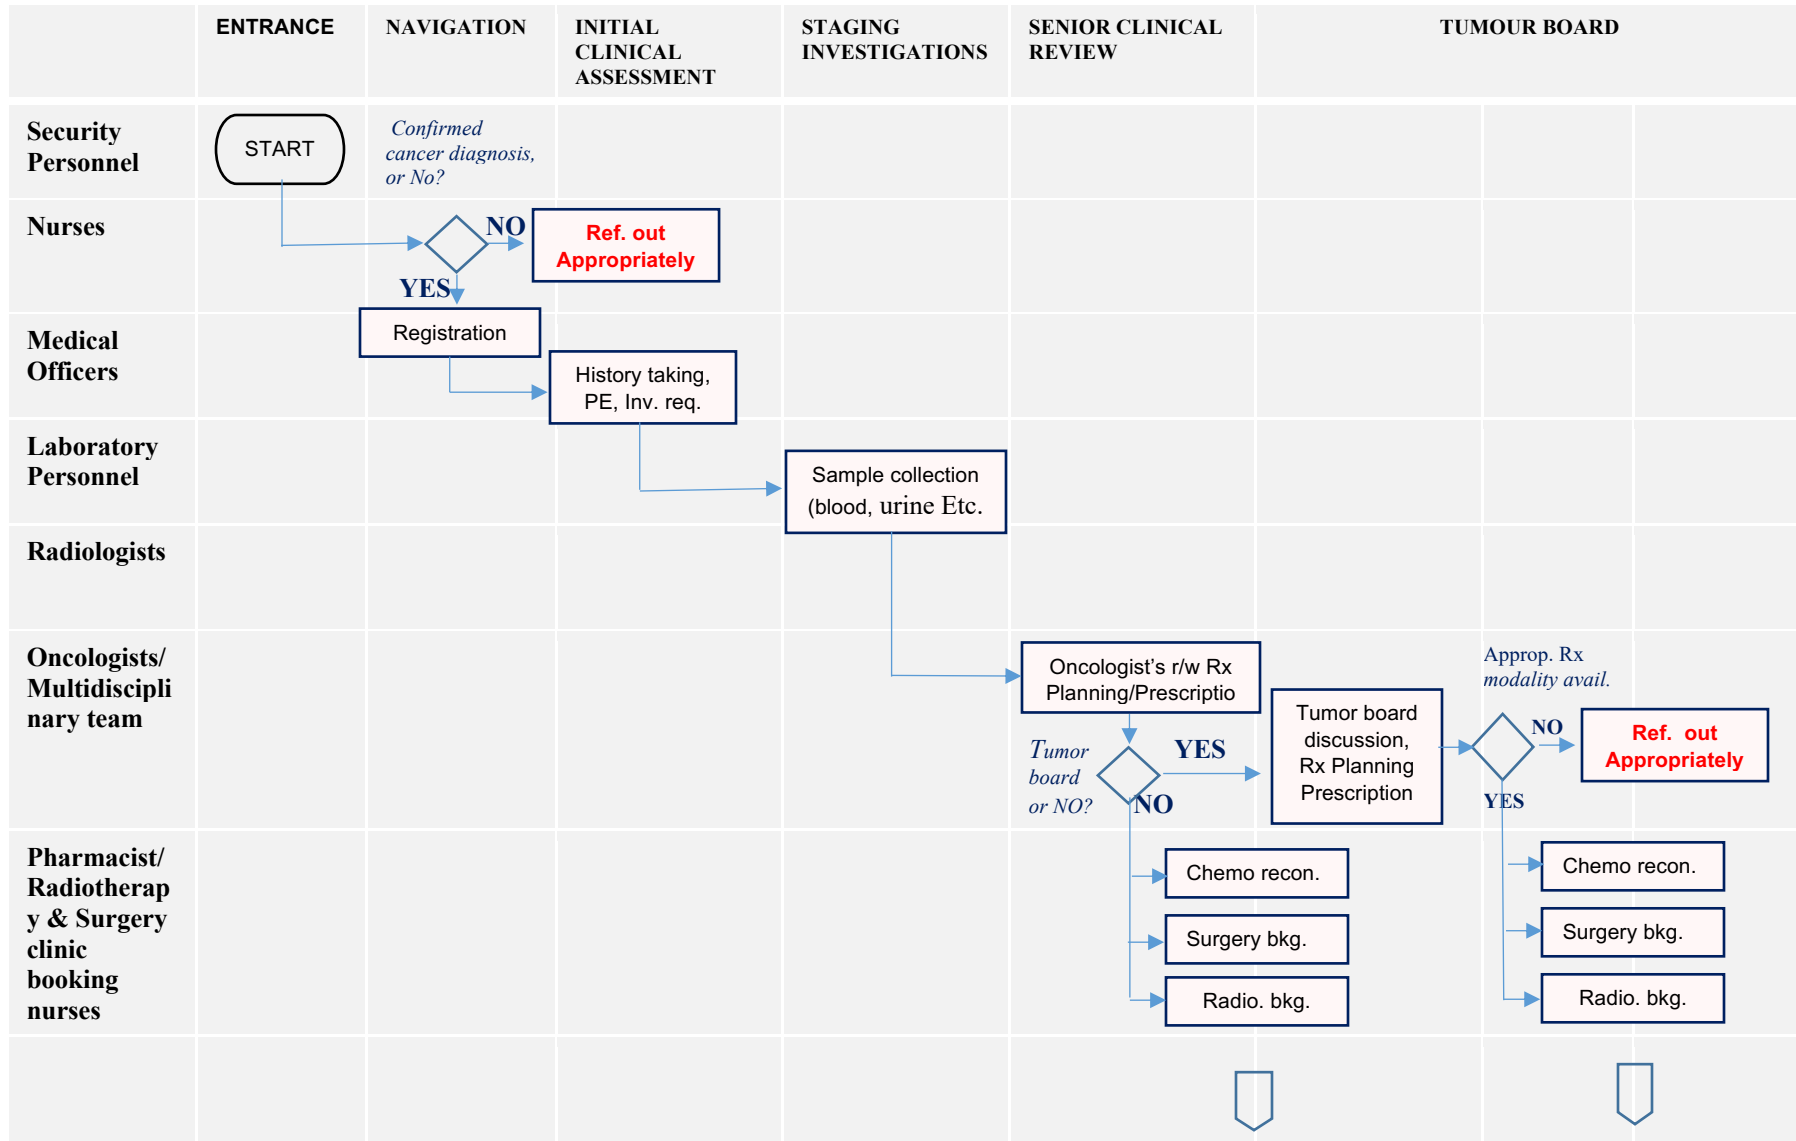

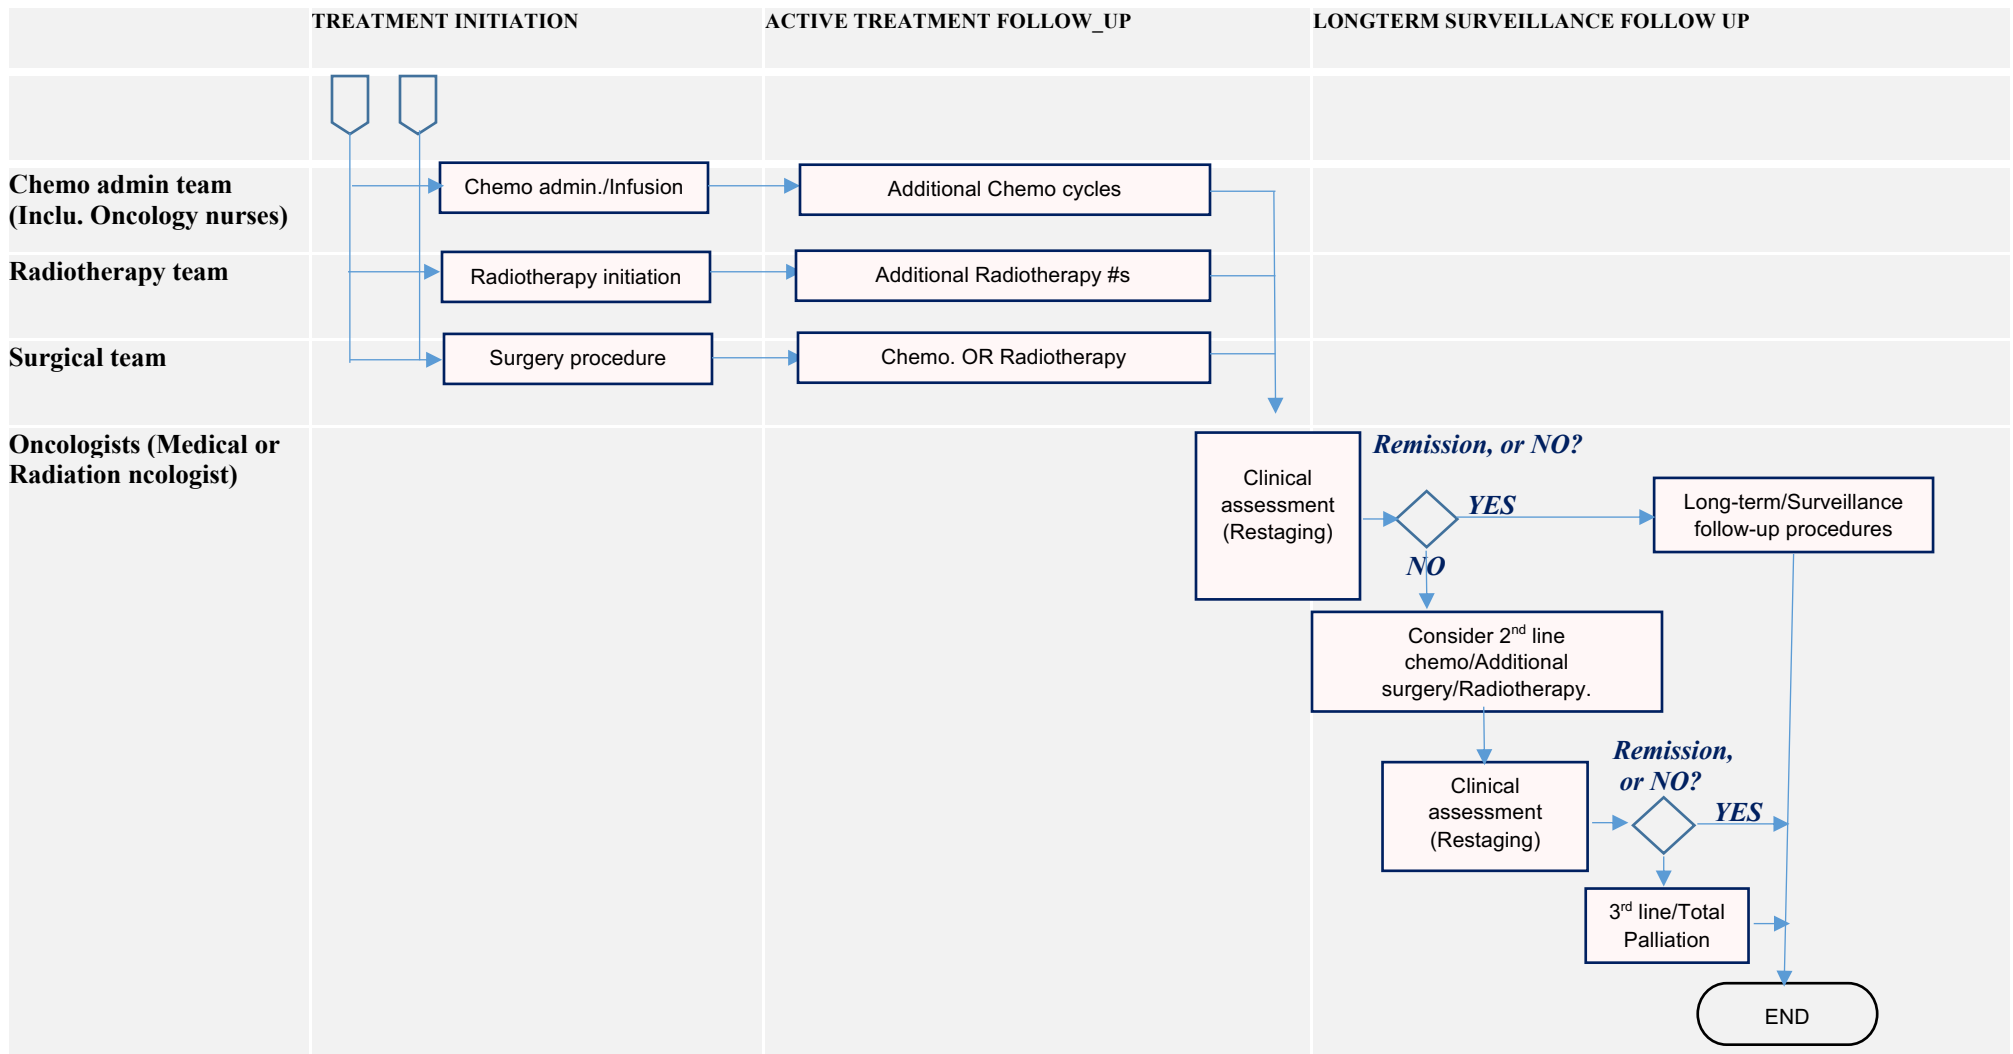

Supplement: Supplementary file 7 [file f101a4ac5effa8a9b4bf7edb.pdf]
